# Supplementary material
Source: Research Square preprint supplement (doi:10.21203/rs.3.rs-9474472/v1)
Supplement: Supplementary file 1 [file 00d9b4e1b3e4c383e36b9720.xlsx]

## Sheet: 8.M-MICOM-Diff. Ab. Met.
Compound ID (McMurGut)	Compound Name	Compound ID (KEGG)	LDAupper	LDAmean	LDAlower	Sign_Group	p-value	FDR
cpd11640	H2	C00282	4.30163	4.26206	4.21851	CO	0.00174512	0.0222503
cpd00130	L-Malate	C00149	4.1046	4.23364	4.04873	CO	0.00404098	0.0317062
cpd00013	NH3	C00014	4.03108	4.21126	3.96123	CO	0.00601121	0.043796
cpd00023	L-Glutamate	C00025	3.98736	4.07756	3.91594	CO	0.00880862	0.0528517
cpd00035	L-Alanine	C00041	3.94764	3.99756	3.88561	CO	0.00174512	0.0222503
cpd00053	L-Glutamine	C00064	3.89374	3.95311	3.83665	CO	0.00174512	0.0222503
cpd00041	L-Aspartate	C00049	3.89556	3.92156	3.8109	CO	0.0127163	0.0648529
cpd23431	3-dehydrocholate		3.72183	3.91773	3.57332	CO	0.0350057	0.123123
cpd00020	Pyruvate	C00022	3.52546	3.86613	3.43722	CO	0.0127163	0.0648529
cpd23430	isocholate		3.43408	3.85529	3.33793	CO	0.0180865	0.0737928
cpd00012	PPi	C00013	3.10252	3.65389	3.00987	CO	0.0127163	0.0648529
cpd00139	Glycolate	C00160	2.91234	3.48358	2.82783	CO	0.0180865	0.0737928
cpd00161	L-Threonine	C00188	4.26257	3.38866	4.20264	BD	0.00174512	0.0222503
cpd00033	Glycine	C00037	4.23896	3.27863	4.18167	BD	0.00404098	0.0317062
cpd00071	Acetaldehyde	C00084	3.95466	3.05866	3.88572	BD	0.00880862	0.0528517
cpd00011	CO2	C00011	3.34793	2.87214	3.19612	BD	0.0180865	0.0737928
