# Supplementary material
Source: Research Square preprint supplement (doi:10.21203/rs.3.rs-9474472/v1)
Supplement: Supplementary file 2 [file 1074cdd679a060c63afa9e12.xlsx]

## Sheet: 2.DO MICOM Diff. ab. met.
Compound ID (Agora)	Compound Name	Compound ID (KEGG)	Metabolic Production in BP Donor (flux[mmol/(h*gDW)] * relative abundance)	Metabolic Production in Healthy Donor (flux[mmol/(h*gDW)] * relative abundance)	Log2(FC)	Group
malt[e]	Maltose	C00208	2.12008e-09	6.27634e-05	14.8535	CO-Donor
malttr[e]	maltotriose	C01835	6.4453e-09	0.000172912	14.7114	CO-Donor
xyl_D[e]	aldehydo-D-xylose	C00181	1.18879e-09	1.08207e-06	9.83008	CO-Donor
glcur[e]	D-glucuronate	C16245	3.55993e-10	2.75791e-07	9.59751	CO-Donor
pydam[e]	Pyridoxamine	C00534	0.00144335	0.512531	8.47207	CO-Donor
sulfp[e]	Sulfapyridine	D02434	0.0301895	5.18185	7.42328	CO-Donor
ssz[e]	Sulfasalazine	C07316	0.0301895	5.18185	7.42328	CO-Donor
olsa[e]	Olsalazine	C07323	0.0190639	2.68757	7.13931	CO-Donor
C02528[e]	chenodeoxycholate	C02528	0.0472804	5.58332	6.88374	CO-Donor
7ocholate[e]	3alpha,12alpha-Dihydroxy-7-oxo-5beta-cholanate	C04643	0.0472115	5.55274	6.87792	CO-Donor
7dhcdchol[e]	7-Dehydrochenodeoxycholate	NaN	0.0472804	5.5472	6.87437	CO-Donor
man[e]	D-Mannose	C00159	0.657497	76.9996	6.87172	CO-Donor
3mop[e]	3-methyl-2-oxopentanoate	C03465	0.0749233	6.50892	6.44086	CO-Donor
bzd[e]	Balsalazide	D07488	0.0695276	5.2576	6.24067	CO-Donor
abz_ala_b[e]	4-Aminobenzoyl-Beta-Alanine	NaN	0.0695276	5.2576	6.24067	CO-Donor
5asa[e]	5-Aminosalicylic Acid (Mesalamine)	NaN	0.077466	5.45461	6.13777	CO-Donor
tab[e]	1,2,4-Triaminobenzene	NaN	0.108746	6.26841	5.84906	CO-Donor
pront[e]	Prontosil	C07573	0.108746	6.26841	5.84906	CO-Donor
ppa[e]	Propionate	C00163	0.721112	41.1234	5.83359	CO-Donor
isoval[e]	Isovalerate, 3-Methylbutanoate	C08262	0.10578	5.98226	5.82155	CO-Donor
isocapr[e]	Isocaproate	NaN	0.211559	11.9056	5.81444	CO-Donor
akg[e]	2-Oxoglutarate	C00026	0.100358	4.27793	5.41369	CO-Donor
pydx[e]	Pyridoxal	C00250	0.0505626	2.06187	5.34973	CO-Donor
meoh[e]	methanol	C00132	0.0720892	2.66569	5.20858	CO-Donor
isobut[e]	Isobutyrate, 2-Methylpropanoate	C02632	0.200948	7.0112	5.12476	CO-Donor
oxa[e]	oxalate(2-)	C00209	0.0123012	0.367991	4.90281	CO-Donor
ichor[e]	Isochorismate	C00885	0.013263	0.303278	4.51516	CO-Donor
mal_L[e]	L-malate	C00149	0.376464	8.47047	4.49186	CO-Donor
leu_L[e]	L-leucine	C00123	0.637171	14.174	4.47542	CO-Donor
sanilamide[e]	Sulfanilamide	C07458	0.136458	3.02073	4.46837	CO-Donor
dhna[e]	1,4-Dihydroxy-2-naphthoate	C03657	0.0307689	0.678286	4.46235	CO-Donor
acmana[e]	N-acetyl-D-mannosamine	C00645	0.00756266	0.157341	4.37886	CO-Donor
glc_D[e]	D-glucose	C00031	3.05819e-06	5.97995e-05	4.28939	CO-Donor
pnto_R[e]	(R)-Pantothenate	C00864	3.01566e-05	0.000559219	4.21287	CO-Donor
cholate[e]	Cholate	C00695	0.338685	5.88666	4.11943	CO-Donor
4abut[e]	4-Aminobutanoate	C00334	0.463973	7.13238	3.94227	CO-Donor
glcn[e]	D-gluconate	C00257	5.73414e-08	8.17437e-07	3.83346	CO-Donor
neopront[e]	Neoprontosil	NaN	0.0817348	1.10493	3.75686	CO-Donor
mqn8[e]	Menaquinone 8	C00828	0.0885686	1.11248	3.65084	CO-Donor
tyr_L[e]	L-tyrosine	C00082	0.371093	4.1675	3.48933	CO-Donor
phenol[e]	Phenol	C00146	0.386824	4.08713	3.40134	CO-Donor
diact[e]	Diacetyl	C00741	0.262131	2.49384	3.25001	CO-Donor
4hbz[e]	4-hydroxybenzoate	C00156	0.453813	4.05909	3.16099	CO-Donor
26dap_M[e]	meso-2,6-Diaminoheptanedioate	C00680	4.26922	32.9777	2.94945	CO-Donor
rib_D[e]	D-ribose	C00121	1.75816	13.0011	2.88649	CO-Donor
val_L[e]	L-valine	C00183	0.510401	3.75522	2.8792	CO-Donor
ptrc[e]	Putrescine	C00134	0.24307	1.71437	2.81824	CO-Donor
no2[e]	Nitrite	C00088	0.08465	0.570086	2.7516	CO-Donor
pi[e]	hydrogenphosphate	C00009	1.95982	12.9245	2.72131	CO-Donor
Lcystin[e]	L-cystine	C00491	0.010268	0.066997	2.70593	CO-Donor
h2[e]	Hydrogen	C00282	13.8498	85.8158	2.63138	CO-Donor
gthox[e]	Oxidized glutathione	C00127	0.0123137	0.0696466	2.49979	CO-Donor
h[e]	proton	C00080	67.1758	328.328	2.28912	CO-Donor
2obut[e]	2-Oxobutanoate	C00109	0.650292	3.13948	2.27137	CO-Donor
glyc3p[e]	Glycerol 3-phosphate	C0093	1.40765	6.71415	2.25392	CO-Donor
ocdca[e]	octadecanoate (n-C18:0)	C01530	0.203829	0.964916	2.24305	CO-Donor
gthrd[e]	Reduced glutathione	C00051	0.024628	0.108797	2.14327	CO-Donor
cit[e]	Citrate	C00158	2.65593	10.7011	2.01047	CO-Donor
gsn[e]	Guanosine	C00387	1.04108	4.1718	2.00259	CO-Donor
12ppd_S[e]	(S)-propane-1,2-diol	C02917	0	1.83529e-09	Inf	CO-Donor
2mbut[e]	2-methylbutyrate	C18319	0	0.126343	Inf	CO-Donor
3dhcdchol[e]	3-Dehydrochenodeoxycholate	NaN	0	0.0361225	Inf	CO-Donor
3dhchol[e]	3-Dehydrocholate	NaN	0	0.026061	Inf	CO-Donor
3meacmp[e]	3-methoxy-acetaminophen	NaN	0	2.70633e-07	Inf	CO-Donor
4hoxpacd[e]	(4-hydroxyphenyl)acetaldehyde	C03765	0	0.00504697	Inf	CO-Donor
4hphac[e]	4-hydroxyphenylacetate	C00642	0	0.00421451	Inf	CO-Donor
ac5asa[e]	N-Acetyl-5-Aminosalicylic Acid	NaN	0	9.16512e-10	Inf	CO-Donor
acnam[e]	N-acetylneuraminate	C00270	0	6.16471e-06	Inf	CO-Donor
adchac[e]	Allodeoxycholic acid	C17687	0	8.96502e-07	Inf	CO-Donor
alchac[e]	Allolithocholic acid	NaN	0	0.0206491	Inf	CO-Donor
bhb[e]	(R)-3-hydroxybutyrate	C01089	0	0.0185434	Inf	CO-Donor
btn[e]	Biotin	C00120	0	1.27806e-06	Inf	CO-Donor
ch4[e]	Methane	C01438	0	2.51121	Inf	CO-Donor
ch4s[e]	Methanethiol	C00409	0	0.104922	Inf	CO-Donor
dchac[e]	deoxycholic acid	C04483	0	8.96619e-07	Inf	CO-Donor
fald[e]	formaldehyde	C00067	0	0.001804	Inf	CO-Donor
gcald[e]	glycolaldehyde	C00266	0	3.86023e-07	Inf	CO-Donor
HC02191[e]	lithocholate	C03990	0	0.0206491	Inf	CO-Donor
icdchol[e]	Isochenodeoxycholate	C17660	0	0.00568758	Inf	CO-Donor
isochol[e]	Isocholate	C17660	0	0.00646584	Inf	CO-Donor
lcts[e]	Lactose	C01970	0	2.69346e-07	Inf	CO-Donor
levantttr[e]	Levantetraose	NaN	0	4.25697e-09	Inf	CO-Donor
M03134[e]	Valeric Acid	C00803	0	0.0900263	Inf	CO-Donor
n2o[e]	Nitrous oxide	C00887	0	0.103322	Inf	CO-Donor
no[e]	Nitric oxide	C00533	0	0.206643	Inf	CO-Donor
ocdcea[e]	octadecenoate (n-C18:1)	C21944	0	0.0494226	Inf	CO-Donor
pcresol[e]	p-Cresol	C01468	0	0.00805504	Inf	CO-Donor
phpyr[e]	keto-phenylpyruvate	C00166	0	0.0432376	Inf	CO-Donor
ppi[e]	Diphosphate	C00013	0	5.96915e-05	Inf	CO-Donor
ppoh[e]	1-Propanol	C05979	0	9.58015e-10	Inf	CO-Donor
pppn[e]	Phenylpropanoate	C05629	0	0.00296949	Inf	CO-Donor
pydx5p[e]	Pyridoxal 5-phosphate	C00018	0	5.06132	Inf	CO-Donor
tma[e]	trimethylamine	C00565	0	0.000312681	Inf	CO-Donor
tmao[e]	Trimethylamine N-oxide	C01104	0	0.000312681	Inf	CO-Donor
trypta[e]	Tryptamine	C00398	0	0.0432666	Inf	CO-Donor
Tyr_ggn[e]	Tyr-194 of apo-glycogenin protein (primer for glycogen synthesis)	NaN	0	1.32787e-08	Inf	CO-Donor
xtsn[e]	xanthosine	C01762	0	0.000969787	Inf	CO-Donor
spmd[e]	Spermidine	C00315	0.00359347	0.00070248	-2.35485	BD-Donor
core2[e]	Core 2	C00547	0.0177154	0.00338041	-2.38974	BD-Donor
fe2[e]	Fe2+	C14818	0.00752159	0.000875195	-3.10336	BD-Donor
fol[e]	Folate	C00504	3.10442e-06	0	Inf	BD-Donor
