# Supplementary material
Source: Research Square preprint supplement (doi:10.21203/rs.3.rs-9474472/v1)
Supplement: Supplementary file 3 [file 1b7c6136115b6b670683b419.xlsx]

## Sheet: 7.M-Diff. Ab. Taxa
Taxa (different levels)	LDAupper	LDAmean	LDAlower	Group	p-value	FDR
622e58a4533f9d05dd83116b257c5d3f s__Akkermansia_muciniphila	4.8997	4.87429	4.84729	CO	0.00174512	0.0203597
9e4a17bd290dda91630bb399d829c443 s__Parabacteroides_distasonis	3.75014	3.65985	3.54571	CO	0.00174512	0.0203597
c__Verrucomicrobiae	4.89624	4.8707	4.84357	CO	0.00174512	0.0203597
f__Akkermansiaceae	4.9	4.8744	4.8472	CO	0.00174512	0.0203597
g__Akkermansia	4.9	4.8744	4.8472	CO	0.00174512	0.0203597
o__Verrucomicrobiales	4.9	4.8744	4.8472	CO	0.00174512	0.0203597
p__Verrucomicrobiota	4.89624	4.8707	4.84357	CO	0.00174512	0.0203597
s__Akkermansia_muciniphila	4.89919	4.87362	4.84646	CO	0.00174512	0.0203597
s__uncultured_Bacteroidales_g__Muribaculaceae	4.41207	4.39571	4.37871	CO	0.00174512	0.0203597
6f79000720675b309cdbb146659b6278 s__uncultured_bacterium_g__Muribaculaceae	3.8495	3.79008	3.72122	CO	0.00404098	0.0321442
8d2b02828a973d4614d3c8411459e2de s__uncultured_bacterium_g__Muribaculaceae	3.81512	3.75483	3.68481	CO	0.00601121	0.0457375
e71720434c326b248d1552ee78ad4e7d s__uncultured_bacterium_g__Prevotellaceae_UCG-001	3.75962	3.71965	3.67563	CO	0.00880862	0.0570929
g__Prevotellaceae_UCG-001	3.89398	3.85227	3.80613	CO	0.00880862	0.0570929
s__uncultured_bacterium_g__Prevotellaceae_UCG-001	3.86857	3.83115	3.7902	CO	0.00880862	0.0570929
cae5a75aa1cde01584455c7c2be4d71f s__uncultured_bacterium_g__Muribaculaceae	3.56486	3.50951	3.44606	CO	0.0127163	0.0717853
102a097b19083481ae75af521474168a s__uncultured_bacterium_g__Muribaculaceae	3.70956	3.6577	3.59881	CO	0.0180865	0.0930921
4bd862c0f19ca9b069f367291d92ea71 s__uncultured_bacterium_g__Muribaculaceae	3.64321	3.59571	3.54237	CO	0.0180865	0.0930921
da8dcaba4d367efef3ea1d379e0b5407 s__uncultured_bacterium_g__Muribaculaceae	3.63816	3.57525	3.50166	CO	0.0180865	0.0930921
323b01b3eb01fbc87af7bfc511fffe44 s__uncultured_bacterium_g__Muribaculaceae	3.63232	3.57378	3.50611	CO	0.0247064	0.116731
107420b0292cccf0116e94d9b1b8e5ff s__uncultured_bacterium_g__Lachnospiraceae_NK4A136_group	3.69186	3.62845	3.55418	CO	0.0251866	0.116731
0b04b6049d85332d1ea0237929f61eba s__uncultured_Bacteroidales_g__Muribaculaceae	3.71087	3.65886	3.59976	CO	0.0253473	0.116731
29fbb4e2ed8ddbc62c548c1417aedc60 s__Bacteroides_vulgatus	3.65309	3.56231	3.44739	CO	0.0253473	0.116731
05743377291d723ca75649ca7b397b40 s__uncultured_Bacteroidales_g__Muribaculaceae	3.68098	3.57969	3.44734	CO	0.0350057	0.142465
159e31a36431fdaee57187e9097a972f s__uncultured_Bacteroidales_g__Muribaculaceae	3.92335	3.87822	3.82784	CO	0.0350057	0.142465
s__gut_metagenome_g__uncultured	3.79051	3.74239	3.68826	CO	0.0350057	0.142465
2fae7a9a3e94c111460618e8beb362be s__uncultured_Bacteroidales_g__Muribaculaceae	3.66132	3.60074	3.53031	CO	0.0476454	0.177403
7d4d34e4eddefde0a9eea2dd13cf098e s__uncultured_Bacteroidales_g__Muribaculaceae	3.79707	3.65084	3.42877	CO	0.0476454	0.177403
32c116f9cecb18c4fb1ddee67dd8de5d s__un_g__Muribaculaceae	4.07857	4.0611	4.0429	BD	0.00166458	0.0203597
abe31c809a61b9b0244ab1417781f814 s__uncultured_organism_g__Muribaculaceae	3.96966	3.89352	3.80115	BD	0.00166458	0.0203597
3bfacf6111d75b96546138f42e834d89 s__uncultured_bacterium_g__Muribaculaceae	3.86711	3.82113	3.76969	BD	0.00172476	0.0203597
4c878ca9b6e171da928c55d6c98f1db1 s__uncultured_bacterium_g__Muribaculaceae	4.77488	4.75045	4.72456	BD	0.00172476	0.0203597
4e1fc7dc43b53deca9b876536bad9c2c s__uncultured_bacterium_g__Muribaculaceae	4.65698	4.63216	4.60583	BD	0.00172476	0.0203597
s__uncultured_bacterium_g__Muribaculaceae	5.0484	5.02619	5.00278	BD	0.00174512	0.0203597
17fa4aac9252ae5c00813b1d7e73fc20 s__gut_metagenome_g__Alloprevotella	4.2675	4.22614	4.18042	BD	0.00267579	0.0234131
f__Muribaculaceae	4.97163	4.9391	4.90393	BD	0.00267579	0.0234131
g__Alloprevotella	4.37414	4.33196	4.28523	BD	0.00267579	0.0234131
g__Muribaculaceae	4.95628	4.92361	4.88828	BD	0.00267579	0.0234131
s__gut_metagenome_g__Alloprevotella	4.37417	4.33197	4.28524	BD	0.00267579	0.0234131
caa02e268230d6520c70b768ceead192 s__uncultured_bacterium_g__Muribaculaceae	3.71984	3.68802	3.65369	BD	0.00404098	0.0321442
94044671d2f7314833e8e98d4f4332d3 s__gut_metagenome_g__Alloprevotella	3.78298	3.74788	3.70971	BD	0.00873444	0.0570929
c__Bacteroidia	4.92465	4.88412	4.83941	BD	0.0127163	0.0717853
o__Bacteroidales	4.92516	4.8844	4.83941	BD	0.0127163	0.0717853
p__Bacteroidota	4.92465	4.88412	4.83941	BD	0.0127163	0.0717853
f30713be1af1d9b2f6daa70170991c5b s__uncultured_bacterium_g__Muribaculaceae	3.60539	3.52226	3.41937	BD	0.0350057	0.142465
s__un_g__Muribaculum	3.66926	3.57331	3.44996	BD	0.0350057	0.142465
5c79b6bf1e78e5d090ba55d885d1c786 s__uncultured_bacterium_g__Muribaculaceae	3.59624	3.52451	3.43855	BD	0.0476454	0.177403
b0e20d4e080c687f3c9521e9d1901525 s__uncultured_bacterium_g__Muribaculaceae	3.90958	3.84295	3.76422	BD	0.0476454	0.177403
