# Supplementary material
Source: Research Square preprint supplement (doi:10.21203/rs.3.rs-9474472/v1)
Supplement: Supplementary file 4 [file 3556fe07636f0d891b904196.xlsx]

## Sheet: 9.Stool-Diff. Ab. Met.
Metabolite	Sgnificant Group	coef	stderr	p-value	q-value
Valeric acid	BD	-0.89262	0.258243	0.00474755	0.132113
D-Fructose	BD	-0.7032	0.265904	0.0213926	0.168968
D-Glucose	BD	-0.354862	0.15868	0.045094	0.263282
Sucrose	BD	-0.273393	0.0942187	0.0132846	0.152773
Capric acid	CO	0.321745	0.109279	0.0122746	0.152773
L-Aspartic acid	CO	0.425379	0.12685	0.00574405	0.132113
L-Glutamic acid	CO	1.37981	0.524954	0.0220393	0.168968
