# Supplementary material
Source: Research Square preprint supplement (doi:10.21203/rs.3.rs-9474472/v1)

**A** Brain: Glycine receptor genes

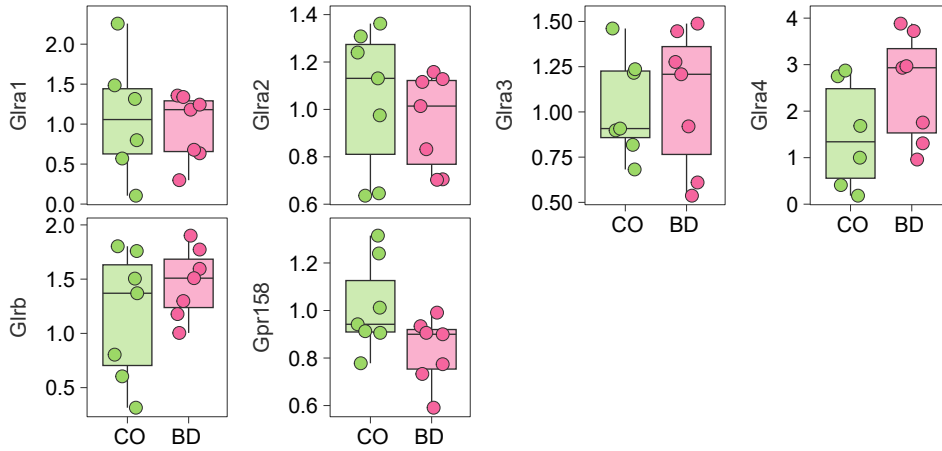

**B** Brain: Immune genes

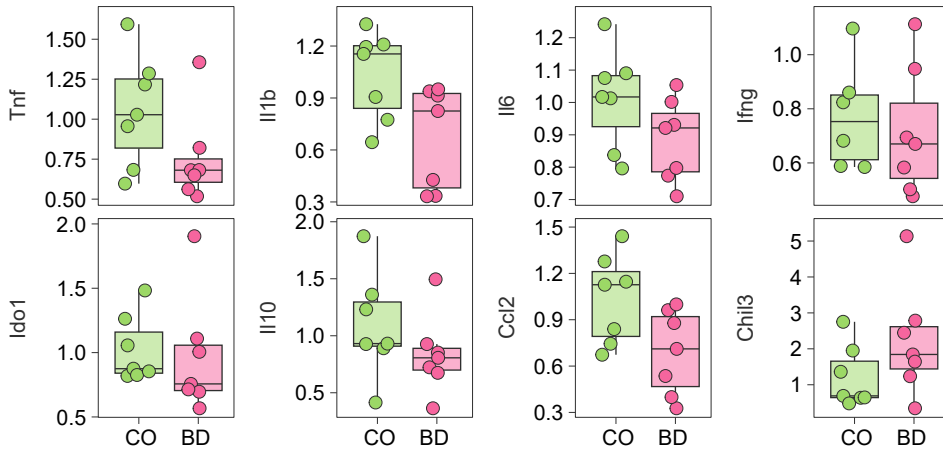

**C** Brain: Microglia genes

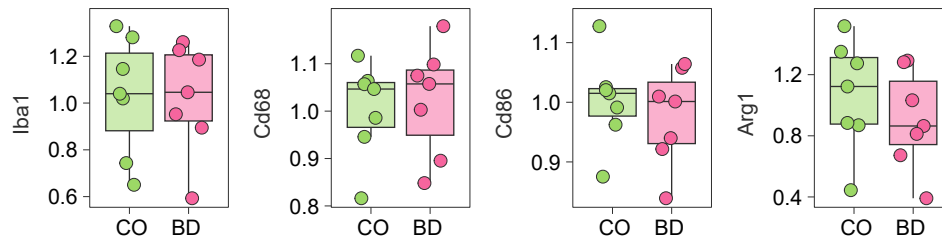

**D** Brain: Tight-junction genes

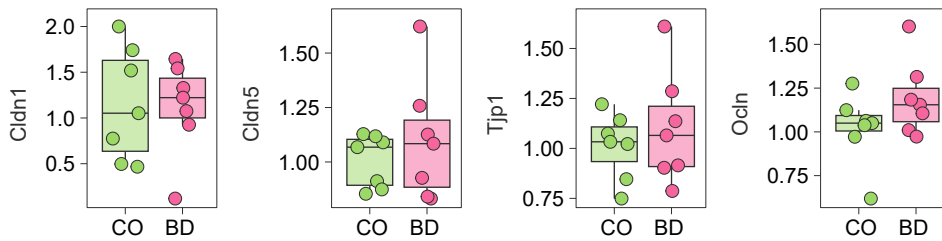

Supplement: Supplementary file 4 [file 7870bbb86d4ccf431ff3daf2.pdf]
