# Supplementary material
Source: Research Square preprint supplement (doi:10.21203/rs.3.rs-9474472/v1)
Supplement: Supplementary file 5 [file 74c86d14fad240867c93df43.xlsx]

## Sheet: 3.Do-Diff. Ab. and Gr. Rate
Genera	Growth Rate CO-Donor (1/h)	Growth Rate BD-Donor (1/h)	Log2(FC) of Growth Rate	Relative Abundance CO-Donor	Relative Abundance BD-Donor	Log2(FC) of Relative Abundance
g__Akkermansia	0.143927	1.20483e-05	13.5442	1.97878	4.14735	-1.06758
g__Alistipes	0.33601	1.43673e-05	14.5134	4.61962	1.32344	1.80348
g__Alloprevotella	0.0124881	0	Inf	0.171692	0.0488915	1.81217
g__Bacteroides	2.68008	0	Inf	36.847	15.0889	1.28806
g__Barnesiella	0.280667	1.23651e-05	14.4703	3.85874	1.63365	1.24003
g__Bifidobacterium	0.43879	0.000115084	11.8966	6.03268	0.0606929	6.63513
g__Blautia	0.120478	2.09306e-05	12.4909	1.65639	12.2397	-2.88545
g__Faecalibacterium	0.171778	3.19574e-05	12.3921	2.36169	3.70058	-0.647933
g__Fusicatenibacter	0.00242574	0.000497469	2.28575	0.0333502	4.79811	-7.16863
g__Gastranaerophilales	0	0	NA	0.0308798	2.92843	-6.56732
g__Hungatella	0.00251772	6.0293e-05	5.38398	0.0234687	0.020231	0.214171
g__Lachnoclostridium	0.0314448	4.46716e-06	12.7812	0.432318	2.33499	-2.43325
g__Methanobrevibacter	0.16522	0	Inf	2.27152	0	Inf
g__Muribaculum	0.0071861	0	Inf	0.0284094	0	Inf
g__Odoribacter	0.00116795	0.0204871	-4.13267	0.0160575	0.0809239	-2.33332
g__Oscillibacter	0.116975	1.40624e-05	13.0221	1.60822	0.195566	3.03974
g__Parabacteroides	0.184446	2.64935	-3.84437	2.53585	36.8524	-3.86122
g__Roseburia	0.110596	0	Inf	1.52052	1.97252	-0.375472
g__Ruminococcus	0.0497726	0.077974	-0.647642	0.684297	0.038776	4.14139
g__Subdoligranulum	0	0	NA	2.32957	0	Inf
g__Dialister	0.00116795	0	Inf	0.0160575	0	Inf
g__Dorea	0.00862486	0.413595	-5.58357	0.118579	0.205682	-0.794569
g__Eggerthella	0.000898423	0	Inf	0.0123519	0	Inf
g__Faecalibacterium	0.171778	3.19574e-05	12.3921	2.36169	3.70058	-0.647933
g__Faecalitalea	0	0.0949245	Inf	0	0.0472056	Inf
g__Flavonifractor	0.00682801	5.94926e-05	6.84261	0.0938747	0.123072	-0.390692
g__Frisingicoccus	0.00378469	0	Inf	0.0135871	0	Inf
g__Fusicatenibacter	0.00242574	0.000497469	2.28575	0.0333502	4.79811	-7.16863
g__Gastranaerophilales	0	0	NA	0.0308798	2.92843	-6.56732
g__Gordonibacter	0.000718738	0	Inf	0.00988154	0	Inf
g__Helicobacter	0.0147341	0.00020055	6.19905	0.202572	0.0573211	1.82129
g__Hungatella	0.00251772	6.0293e-05	5.38398	0.0234687	0.020231	0.214171
g__Intestinibacter	0.00583975	0	Inf	0.0802876	0	Inf
g__Lachnoclostridium	0.0314448	4.46716e-06	12.7812	0.432318	2.33499	-2.43325
g__Lachnospira	0.0226402	2.32891e-05	9.92502	0.311269	0.15679	0.989327
g__Lactobacillus	0	0	NA	0.00864635	0	Inf
g__Marvinbryantia	0.0037262	0	Inf	0.0494077	0	Inf
g__Methanobrevibacter	0.16522	0	Inf	2.27152	0	Inf
g__Monoglobus	0	0	NA	0.137106	0.0219169	2.64518
g__Muribaculum	0.0071861	0	Inf	0.0284094	0	Inf
g__Odoribacter	0.00116795	0.0204871	-4.13267	0.0160575	0.0809239	-2.33332
g__Oscillibacter	0.116975	1.40624e-05	13.0221	1.60822	0.195566	3.03974
g__Parabacteroides	0.184446	2.64935	-3.84437	2.53585	36.8524	-3.86122
g__Paraprevotella	0.000988265	0	Inf	0.0135871	0	Inf
g__Parasutterella	0.00413274	0	Inf	0.0568189	0	Inf
g__Phascolarctobacterium	0	0.00863784	Inf	0	0.0134873	Inf
g__Prevotella	0.0147341	0	Inf	0.202572	0	Inf
g__Pseudoflavonifractor	0.0026374	0	Inf	0.0185279	0	Inf
g__Roseburia	0.110596	0	Inf	1.52052	1.97252	-0.375472
g__Ruminococcus	0.0497726	0.077974	-0.647642	0.684297	0.038776	4.14139
g__Subdoligranulum	0	0	NA	2.32957	0	Inf
g__Sutterella	0	0.0120767	Inf	0	0.158476	Inf
g__Terrisporobacter	0.00134763	0	Inf	0.0185279	0	Inf
