# Supplementary material
Source: Research Square preprint supplement (doi:10.21203/rs.3.rs-9474472/v1)
Supplement: Supplementary file 6 [file 8ad3ca4b153c1a006b6c7cf7.xlsx]

## Sheet: 4.M-Diff. Gr. Rate
Genera	LDAupper	LDAmean	LDAlower	Sign_Group	p-value	FDR
g__Akkermansia	2.49635	2.46443	2.42999	CO	0.00174512	0.0287945
