# Supplementary material
Source: Research Square preprint supplement (doi:10.21203/rs.3.rs-9474472/v1)
Supplement: Supplementary file 7 [file 9a5d88aeea4066e7e3c4b307.xlsx]

## Sheet: 5.Alpha_Diversity
SID	Group	Observed ASVs	Shannon	Pielou	PD
Co.Donor.fq	CO-Donor	587	4.53989	0.712137	30.296
FMT3.1.Co.fq	CO	739	5.01466	0.759188	42.3749
FMT3.10.BIP.fq	BD	577	4.22174	0.664021	39.0102
FMT3.11.BIP.fq	BD	658	4.50189	0.693751	43.8374
FMT3.12.Co.fq	CO	631	4.89241	0.758831	40.3797
FMT3.13.Co.fq	CO	630	4.50368	0.698708	38.7711
FMT3.14.Co.fq	CO	605	4.65276	0.7264	37.1194
FMT3.2.Co.fq	CO	738	5.03368	0.762223	42.0374
FMT3.3.Co.fq	CO	608	3.9967	0.623493	38.1668
FMT3.4.Co.fq	CO	747	4.46609	0.675037	50.6266
FMT3.5.BIP.fq	BD	783	5.02763	0.754544	51.421
FMT3.6.BIP.fq	BD	745	4.47387	0.676487	47.7134
FMT3.7.BIP.fq	BD	745	5.08901	0.769501	44.8945
FMT3.8.BIP.fq	BD	717	4.50753	0.685549	44.6403
FMT3.9.BIP.fq	BD	621	4.42136	0.687473	39.7059
Mix.Donor.fq	BD-Donor	223	3.37348	0.62389	16.3378
p-val (wilcox.test)	CO vs BD	0.53	0.8	0.21	0.53
