# Supplementary material
Source: Research Square preprint supplement (doi:10.21203/rs.3.rs-9474472/v1)
Supplement: Supplementary file 8 [file a90d4a7cc52769769d27f4e1.docx]

Donor Microbiota Metabolic Capacity Determines Engraftment Dynamics and Modulates Gut–Brain Signaling in Recipient Mice

## Supplementary Methods

Donor Characteristics

The BD donor was taking only a minimal dose of venlafaxine (37.5 mg/day) and had declined treatment with mood stabilizers, resulting in a condition closely resembling a drug-naïve state. Informed consent for participation in the study was obtained during a euthymic phase. For both the BD and control donor, exclusion criteria comprised antibiotic or antifungal use within the past month; regular consumption of prebiotics or probiotics; presence of acute or chronic somatic illnesses or infections (e.g., rheumatoid arthritis, systemic lupus erythematosus, neurodegenerative or neuroinflammatory conditions); severe alcohol or substance abuse; dementia; a history of gastrointestinal disorders such as inflammatory bowel disease or irritable bowel syndrome; prior gastrointestinal surgery (excluding appendectomy); current pregnancy or lactation; and any diagnosed eating disorder (including anorexia or bulimia) within the preceding two years, as well as habitual laxative use. Self-reported data indicated no significant differences in somatization between the donors.

Open Field Test

All mice underwent the open field test (OFT) six days after FMT [[38]](https://www.zotero.org/google-docs/?jcRnv9). The test was conducted in a gray, opaque plastic arena measuring 50 × 50 × 40 cm, illuminated at 35 lux. Each mouse was placed in a corner of the apparatus, and recorded over a 5-minute period using a video tracking system (EthoVision, Noldus, the Netherlands). For behavioral analysis, the arena was subdivided into a 36 × 36 cm central zone and a surrounding peripheral zone.

Elevated Plus Maze

Mice from both groups were evaluated using the elevated plus maze (EPM) 10 days after FMT [[38]](https://www.zotero.org/google-docs/?KSh9Ws). The EPM apparatus consisted of two opposing open arms and two closed arms, elevated 60 cm above the floor and illuminated at 35 lux from above. Over a 5-minute testing period, mouse behavior was recorded and analyzed using EthoVision tracking software (Noldus, the Netherlands).

Light/Dark Box Test

Thirteen days after FMT, mice were subjected to the light/dark box test (LDT) [[38]](https://www.zotero.org/google-docs/?gGACmX). The apparatus (TSE Systems) consisted of two equal-sized compartments separated by a partition with a doorway. The light compartment was constructed with transparent walls and brightly illuminated at 350–400 lux, while the dark compartment featured black acrylic walls and was dimly lit at 20 lux. Each mouse was introduced into the light compartment, facing the opening to the dark chamber. Locomotor activity and exploratory behavior were recorded over a 10-minute session using external infrared sensors that detected light beam interruptions (TSE Systems, Bad Homburg, Germany).

Tissue Extraction and Processing

Following deep anesthesia, blood was collected via cardiac puncture using syringes containing 3.8% sodium citrate as an anticoagulant. Samples were centrifuged at 4500 x g for 15 minutes at 4°C, and stored at −70°C for later analysis. Brains were dissected and snap-frozen in cooled 2-methylbutane. Simultaneously, fecal pellets and colon sections were snap-frozen on dry ice and stored at −70°C for future processing. The amygdalae were microdissected under a stereomicroscope (Bregma −0.58 to −2.54) on a −20°C cold plate (Weinkauf Medizintechnik, Forchheim, Germany) [[33]](https://www.zotero.org/google-docs/?ylUoiS). Dissection tools were decontaminated with RNase AWAY (Carl Roth, Karlsruhe, Germany). Microdissected brain tissues were stored at −70°C until further analysis.

Sample Preparation for NMR Spectroscopy and Data Processing

Between 50 and 100 mg of stool or tissue were homogenized in 200 μL of water and 400 μL of methanol to precipitate proteins and halt enzymatic activity. Tissue lysis was performed using a Precellys homogenizer (Bertin Technologies SAS, Montigny-le-Bretonneux, France), and the lysates were stored at −20°C for 1 hour. Samples were then centrifuged at 10,000 × g for 30 minutes at 4°C. Supernatants were lyophilized and subsequently reconstituted in 500 μL of NMR buffer (0.08 M Na₂HPO₄, 5 mM 3-(trimethylsilyl)propionic acid-2,2,3,3-d₄ sodium salt (TSP), 0.04% [w/v] NaN₃ in D₂O), with the pH adjusted to 7.4 using either HCl or NaOH. Prepared samples were transferred into 5-mm NMR tubes for analysis using the Carr–Purcell–Meiboom–Gill (CPMG) pulse sequence. Spectral preprocessing and analysis were conducted using custom Matlab® scripts developed by the group of Prof. Jeremy Nicholson (Imperial College London) [[36]](https://www.zotero.org/google-docs/?5Vrkzr). NMR spectra were imported into Matlab® vR2014b (MathWorks, Natick, MA, USA), with spectral regions corresponding to water, TSP, and residual methanol excluded. Data were aligned and normalized for metabolite concentration variability using probabilistic quotient normalization [[37]](https://www.zotero.org/google-docs/?b9w2nz). Metabolite intensities are reported in arbitrary units (A.U.), proportional to the area under the corresponding spectral peaks.

RT-qPCR

The following TaqMan® Gene Expression Assays were used: Tnf (Mm00443258_m1), Il1b (Mm00434228_m1), Il6 (Mm00446190_m1), Ifng (Mm01168134_m1), Ido1 (Mm00492590_m1), Il10 (Mm01288386_m1), Ccl2 (Mm00441242_m1), Chil3 (Mm00657889_mH), Iba1 (Mm00479862_g1), Cd68 (Mm03047343_m1), Arg1 (Mm00475988_m1), Cldn1 (Mm00516701_m1), Cldn5 (Mm00727012_s1), Tjp1 (Mm00493699_m1), Ocln (Mm00500912_m1), Glra1 (Mm00445061_m1), Glra2 (Mm01168376_m1), Glra3 (Mm00475507_m1), Glra4 (Mm00501674_m1), Glrb (Mm00439140_m1), and Gpr158 (Mm00558878_m1). Reactions were carried out using TaqMan® Gene Expression Master Mix (Life Technologies), with each sample measured in duplicate. Expression levels were normalized against the reference genes Actb, Gapdh, and Ppil3.

16S rRNA Gene Sequencing

The V3–V4 hypervariable regions of the bacterial 16S rRNA gene were amplified using primers 341F (5′-CCTAYGGGRBGCASCAG-3′) and 806R (5′-GGACTACNNGGGTATCTAAT-3′), with the inclusion of sample-specific molecular barcodes. Amplifications were performed using the Phusion High-Fidelity PCR Master Mix (New England Biolabs). PCR products were size-selected via 2% agarose gel electrophoresis, pooled in equimolar concentrations, end-repaired, A-tailed, and ligated with Illumina sequencing adapters. The final libraries were sequenced on an Illumina NovaSeq platform (PE250), generating 250 bp paired-end reads. Mean read depth was 133.190 reads per sample.

16S rRNA Gene Sequencing Data Processing

Further analyses and data visualizations were conducted in R using the MicrobiotaProcess package and ggplot2 [[40, 41]](https://www.zotero.org/google-docs/?a0sHDD). Prior to analysis, all unclassified reads, as well as those assigned to unknown bacterial phyla Chloroplast, Mitochondria, or Chloroflexi, were removed. To prevent overestimation of alpha and beta diversity metrics, read counts were rarefied to 52,500 reads per sample. Alpha diversity significance was evaluated using the Wilcoxon rank-sum test, while beta diversity significance was assessed via PERMANOVA (adonis) with 9,999 permutations. For differential abundance analysis, taxa with a relative abundance below 0.2% and presence in fewer than 30% of samples were filtered out. The analysis was performed across all taxonomic levels using the mp_diff_analysis function from the MicrobiotaProcess package. A p-value cutoff of 0.05 and a linear discriminant analysis (LDA) score threshold of 3 were applied to determine significance. In cases where statistical testing was not feasible due to one-to-one sample comparisons (e.g., between individual healthy and BD donors), log2 fold change (log2FC) was calculated to assess differential abundance. Taxa with an absolute log2FC greater than 2 (|log2FC| > 2) were considered substantially changed.

Correlation Analysis

For each pairwise comparison, raw p-values were subsequently adjusted for multiple testing using the Benjamini-Hochberg (BH) procedure to control the false discovery rate. Final visualizations, including all correlation networks, were created in R using the ggplot2 and visNetwork packages [[41, 46]](https://www.zotero.org/google-docs/?wqkV5G). Metabolic and qPCR data were log2-transformed prior to correlation analysis, whereas relative abundance values underwent arcsine square root transformation before analysis.
