# Supplementary material
Source: Research Square preprint supplement (doi:10.21203/rs.3.rs-9474472/v1)
Supplement: Supplementary file 9 [file b13b38ff1dbb6d57f7022eee.xlsx]

## Sheet: 10.Brain-Diff. Ab. Met.
Metabolite	Significant Group	coef	stderr	p-value	q-value
Choline	CO	0.419312	0.131136	0.00766754	0.0920105
L-Methionine	CO	0.3597	0.124679	0.0137024	0.0939591
Inosine	CO	0.335853	0.115141	0.0129148	0.0939591
Glycerol	CO	0.254199	0.0759725	0.00582377	0.0920105
Acetic acid	CO	0.236429	0.0864148	0.0180652	0.108391
Pyroglutamic acid	CO	0.170372	0.0647104	0.0218609	0.116592
Glycine	CO	0.163853	0.0401227	0.00151567	0.0727523
Phosphorylcholine	CO	0.105544	0.0422348	0.027967	0.134241
Inosinic acid	BD	-0.339082	0.112672	0.0108737	0.0939591
Adenosine monophosphate	BD	-0.760627	0.224475	0.00538323	0.0920105
