# Supplementary material
Source: Research Square preprint supplement (doi:10.21203/rs.3.rs-9474472/v1)
Supplement: Supplementary file 10 [file ce82307388167a8af946469e.xlsx]

## Sheet: 1. DO Diff. ab.
	Co.Donor.fq	Mix.Donor.fq	log2_FC	node	Sign_Group
g__Odoribacter	0.0160575	0.0809239	2.33332	g__Odoribacter	BD-Donor
g__un_f__Prevotellaceae	0.00247039	0.0134873	2.44879	g__un_f__Prevotellaceae	BD-Donor
g__Parabacteroides	2.53585	36.8524	3.86122	g__Parabacteroides	BD-Donor
g__Gastranaerophilales	0.0308798	2.92843	6.56732	g__Gastranaerophilales	BD-Donor
g__Erysipelotrichaceae_UCG-003	0.0938747	0.38776	2.04636	g__Erysipelotrichaceae_UCG-003	BD-Donor
g__[Ruminococcus]_torques_group	0.0172927	0.677738	5.29249	g__[Ruminococcus]_torques_group	BD-Donor
g__Blautia	1.65639	12.2397	2.88545	g__Blautia	BD-Donor
g__Fusicatenibacter	0.0333502	4.79811	7.16863	g__Fusicatenibacter	BD-Donor
g__Lachnoclostridium	0.432318	2.33499	2.43325	g__Lachnoclostridium	BD-Donor
g__Lachnospiraceae_ND3007_group	0.0185279	0.0876675	2.24234	g__Lachnospiraceae_ND3007_group	BD-Donor
g__Lachnospiraceae_UCG-004	0.0308798	0.330439	3.41965	g__Lachnospiraceae_UCG-004	BD-Donor
g__Lachnospiraceae_UCG-010	0.0469373	0.43328	3.20649	g__Lachnospiraceae_UCG-010	BD-Donor
g__uncultured_f__uncultured_f__uncultured_o__Rhodospirillales	0.0506429	3.06836	5.92097	g__uncultured_f__uncultured_f__uncultured_o__Rhodospirillales	BD-Donor
g__Bifidobacterium	6.03268	0.0606929	6.63513	g__Bifidobacterium	CO-Donor
g__Prevotellaceae_NK3B31_group	0.185279	0.0337183	2.4581	g__Prevotellaceae_NK3B31_group	CO-Donor
g__Anaeroplasma	0.977038	0.0168591	5.85681	g__Anaeroplasma	CO-Donor
g__Clostridia_UCG-014	1.42047	0.220855	2.6852	g__Clostridia_UCG-014	CO-Donor
g__A2	0.216159	0.038776	2.47885	g__A2	CO-Donor
g__GCA-900066575	0.114873	0.0236028	2.28301	g__GCA-900066575	CO-Donor
g__Lachnospiraceae_UCG-001	0.51384	0.0438338	3.55121	g__Lachnospiraceae_UCG-001	CO-Donor
g__Monoglobus	0.137106	0.0219169	2.64518	g__Monoglobus	CO-Donor
g__[Eubacterium]_coprostanoligenes_group	0.936276	0.059007	3.98798	g__[Eubacterium]_coprostanoligenes_group	CO-Donor
g__Butyricicoccus	0.855989	0.0286605	4.90045	g__Butyricicoccus	CO-Donor
g__Colidextribacter	0.937512	0.133187	2.81538	g__Colidextribacter	CO-Donor
g__Oscillibacter	1.60822	0.195566	3.03974	g__Oscillibacter	CO-Donor
g__un_f__Oscillospiraceae	0.579306	0.00168591	8.42465	g__un_f__Oscillospiraceae	CO-Donor
g__uncultured_f__Oscillospiraceae	0.822639	0.0859816	3.25816	g__uncultured_f__Oscillospiraceae	CO-Donor
g__[Eubacterium]_siraeum_group	0.176633	0.0185451	3.25165	g__[Eubacterium]_siraeum_group	CO-Donor
g__Anaerotruncus	0.248274	0.0421479	2.5584	g__Anaerotruncus	CO-Donor
g__Incertae_Sedis	0.0901691	0.00842957	3.4191	g__Incertae_Sedis	CO-Donor
g__Ruminococcus	0.684297	0.038776	4.14139	g__Ruminococcus	CO-Donor
g__uncultured_f__Ruminococcaceae	0.370558	0.0404619	3.19506	g__uncultured_f__Ruminococcaceae	CO-Donor
