# Supplementary material
Source: Research Square preprint supplement (doi:10.21203/rs.3.rs-9474472/v1)
Supplement: Supplementary file 11 [file deebbd2405e82222fc5d189d.xlsx]

## Sheet: 6.Beta_Diversity
Adonis	factors	Df	SumOfSqs	R2	F	Pr(>F)
Bray_Curtis	Group	1	0.747529	0.381287	7.39511	0.0007
Bray_Curtis	Residual	12	1.21301	0.618713	NA	NA
Bray_Curtis	Total	13	1.96054	1	NA	NA
Unweighted_Unifrac	Group	1	0.195173	0.094707	1.25538	0.0102
Unweighted_Unifrac	Residual	12	1.86563	0.905293	NA	NA
Unweighted_Unifrac	Total	13	2.06081	1	NA	NA
Weighted_Unifrac	Group	1	0.1669	0.638725	21.2157	0.0007
Weighted_Unifrac	Residual	12	0.0944014	0.361275	NA	NA
Weighted_Unifrac	Total	13	0.261301	1	NA	NA
