# Supplementary material
Source: Research Square preprint supplement (doi:10.21203/rs.3.rs-9474472/v1)

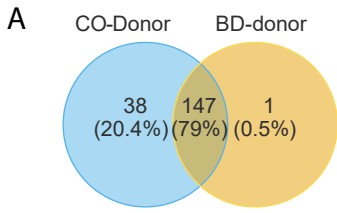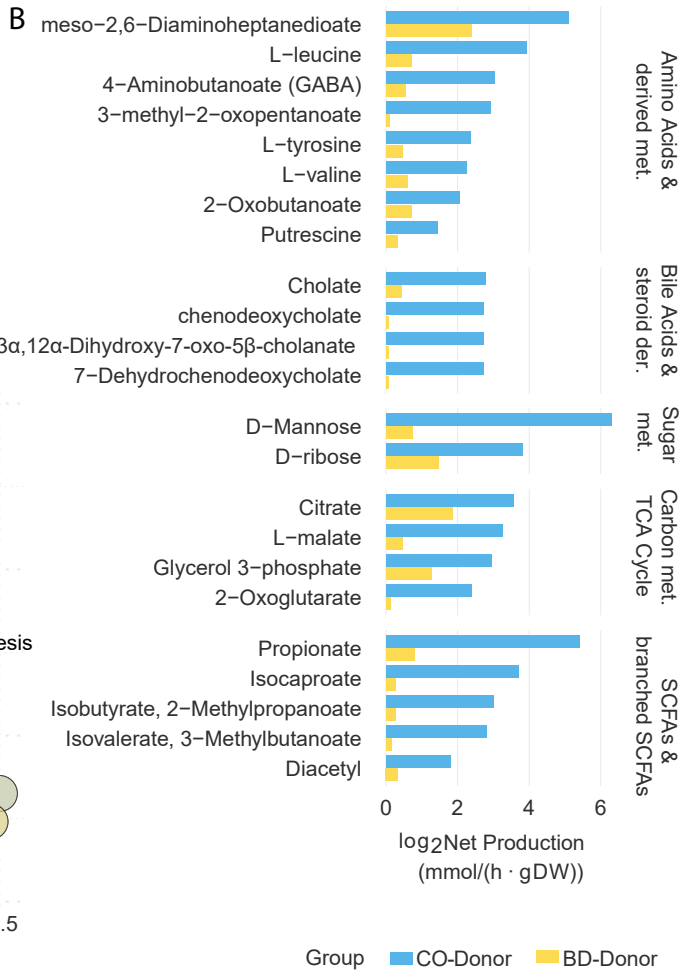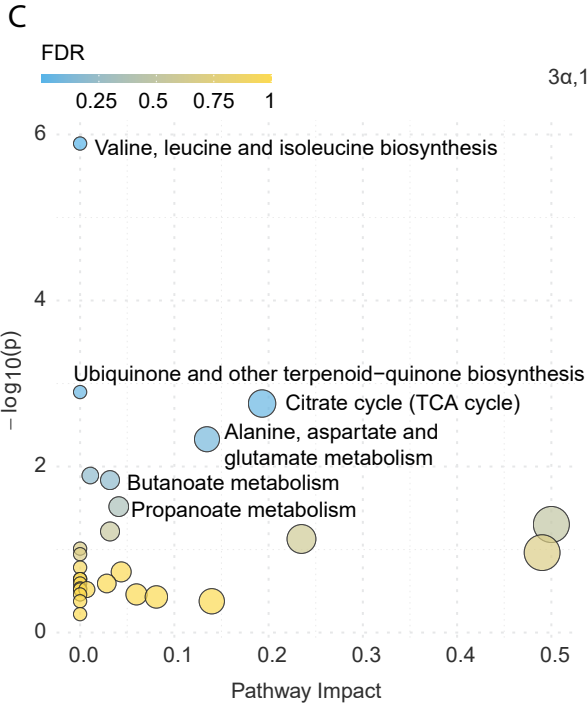

Supplement: Supplementary file 1 [file 16436bb46936bde45b0ecc04.pdf]

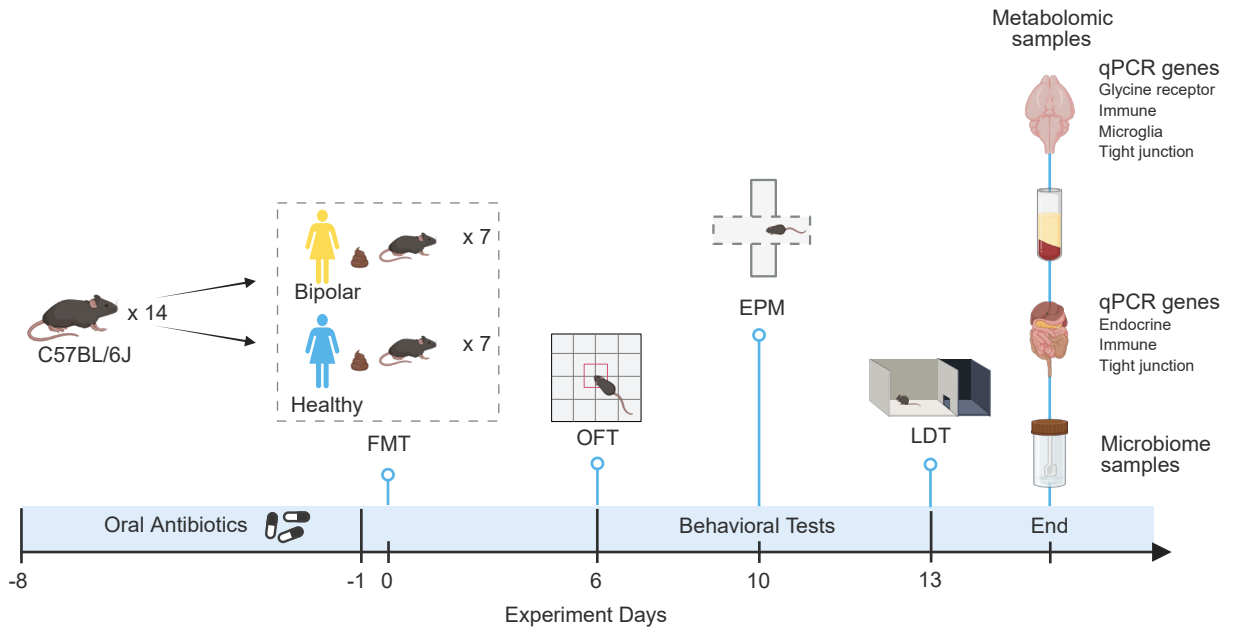

Supplement: Supplementary file 2 [file 32a766885d760ab076066980.pdf]

**A** EPM test: center-point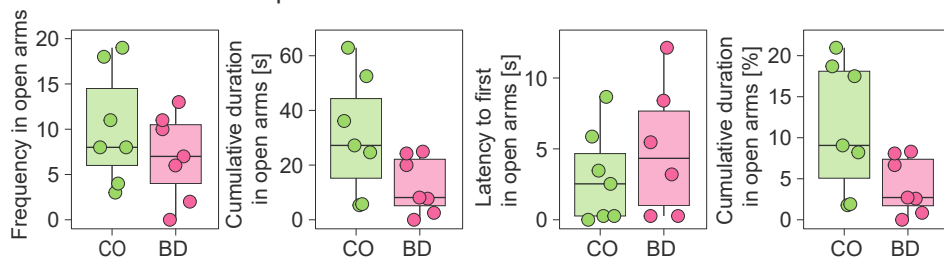**B** EPM test: nose-point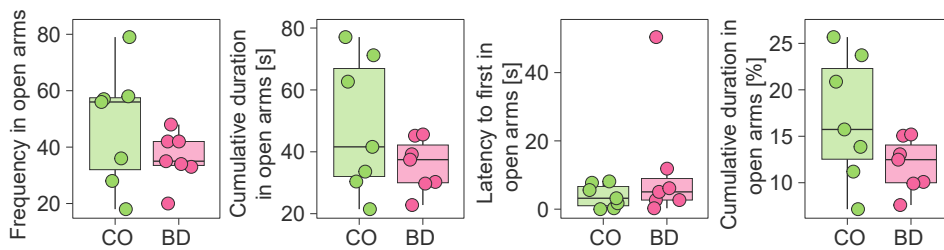**C** LDT: Locomotion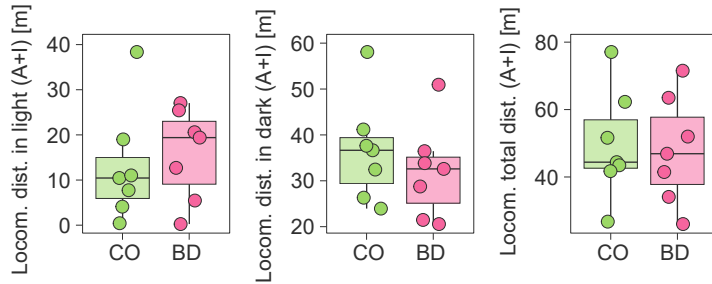**D** LDT: Speed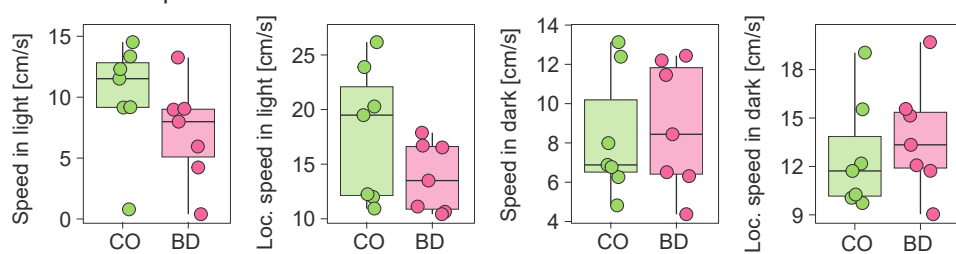**E** OFT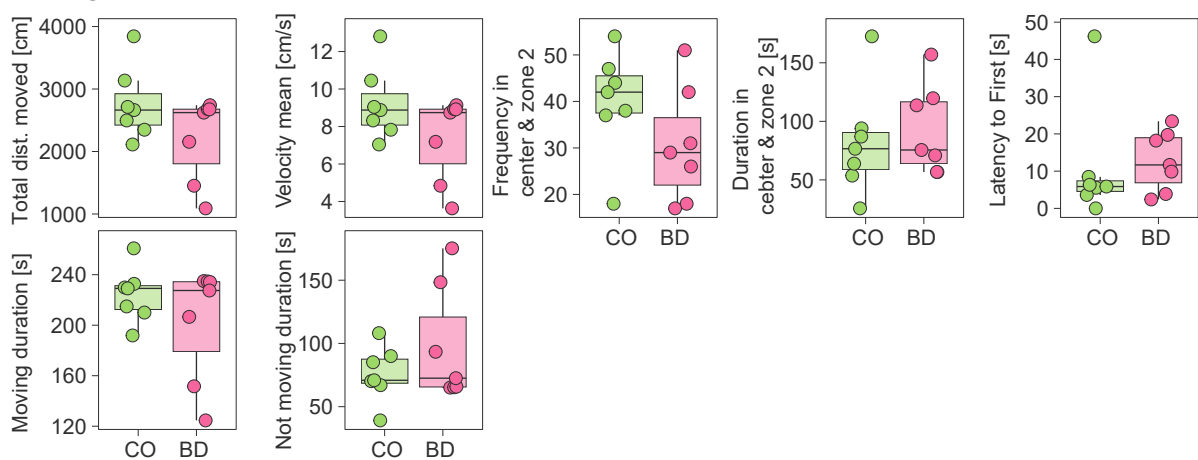

Supplement: Supplementary file 3 [file 41988dc9078c9e4cc087dcd7.pdf]

A

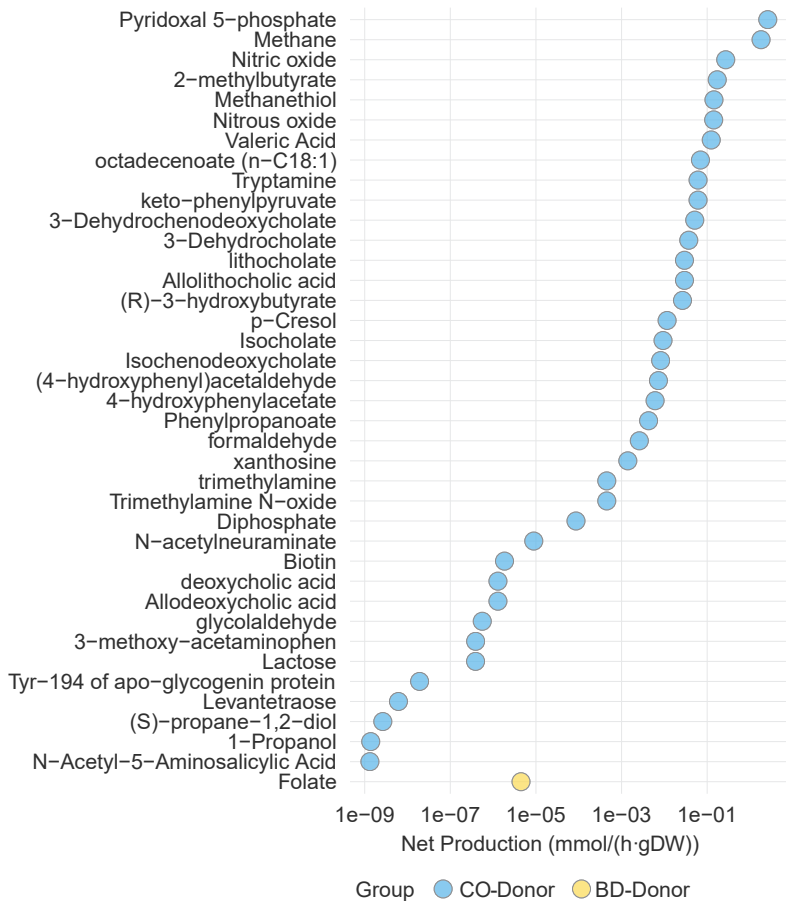

B

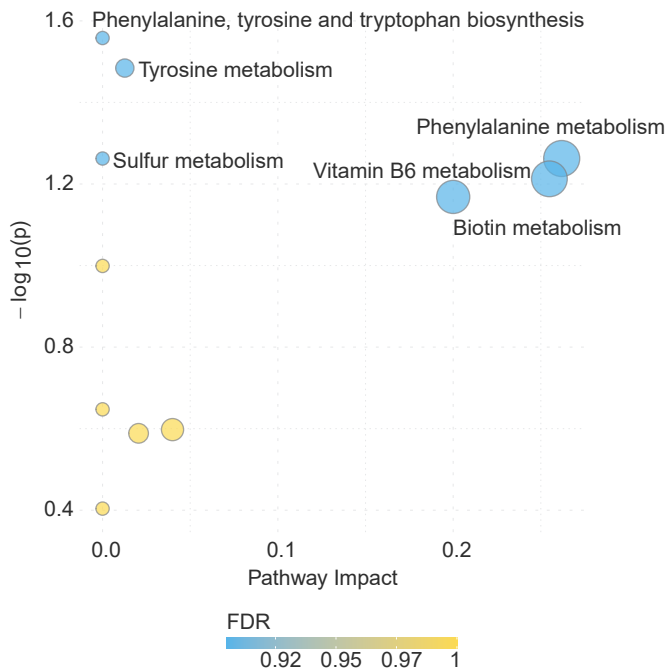

Supplement: Supplementary file 6 [file 86223427a7febbafb34850de.pdf]

### A Colon: Tight-junction genes

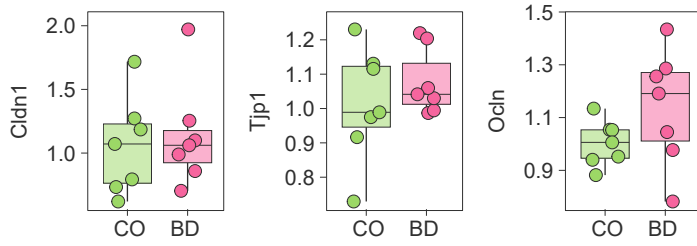

### B Colon: Immune genes

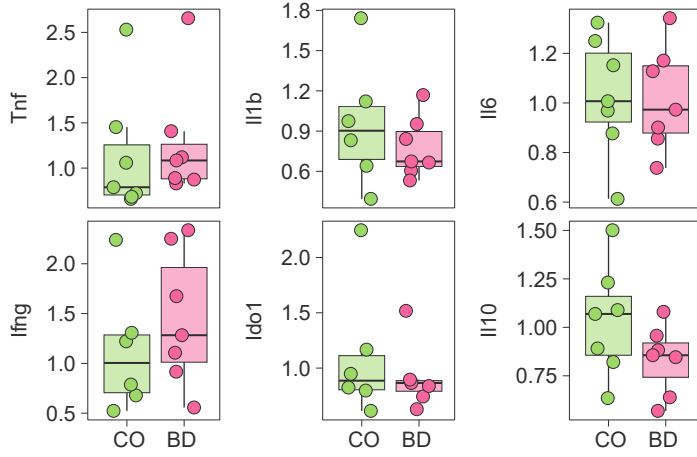

Supplement: Supplementary file 7 [file a7c4230cd5fb0ae7ca5056e3.pdf]

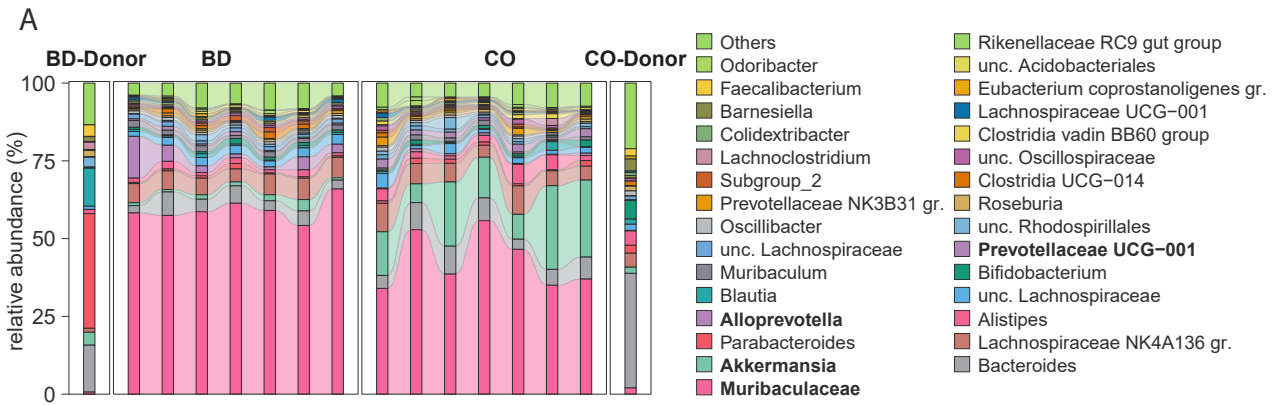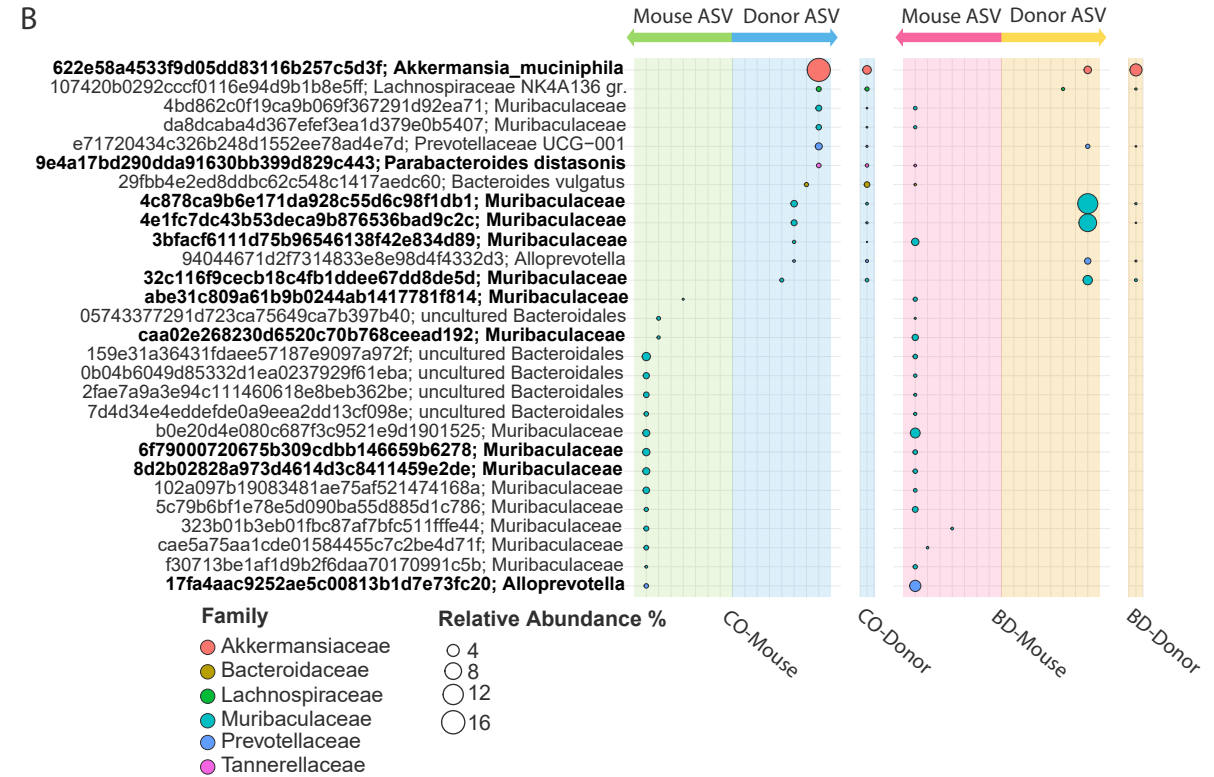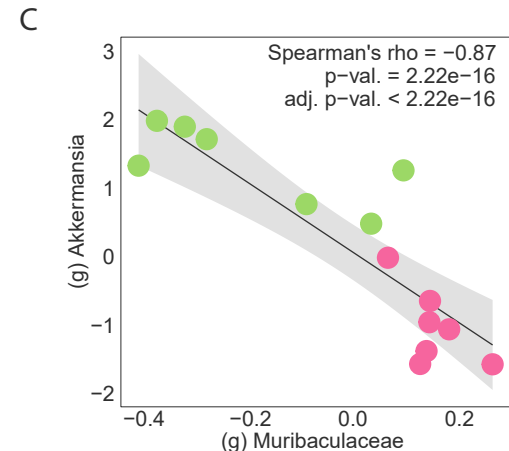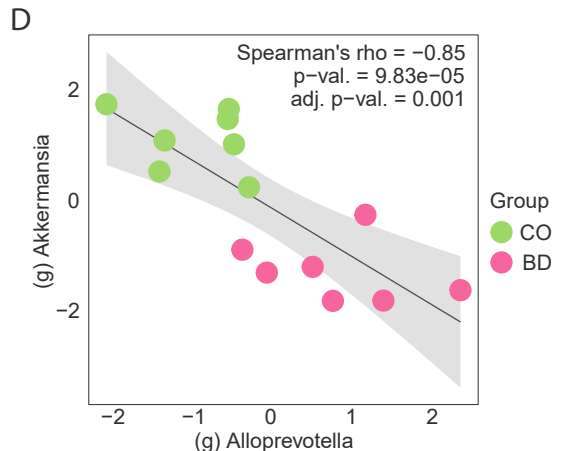

Supplement: Supplementary file 9 [file e73bbfd61a131c8146477486.pdf]
